# Supplementary material for: The Role of Alternative Oxidase in the Interplay between Nitric Oxide, Reactive Oxygen Species, and Ethylene in Tobacco (Nicotiana tabacum L.) Plants Incubated under Normoxic and Hypoxic Conditions
Source: MDPI journal article supplement (doi:10.3390/ijms23137153), 2022-06-28
Supplement: s1 [file s1]

**Supplementary Table S1.** Primers used for qRT-PCR assays of tobacco leaves

| Primer  | Forward sequence        | Reverse sequence        | Accession no/References    |
|---------|-------------------------|-------------------------|----------------------------|
| NtACT   | TTGGCTTACATTGCTCTTG     | TCATTGATGGTTGGAACAG     | XM_033660572.1             |
| GAPDH   | GGCAGCATCCTTCAACATTATTC | CTCGGAAAGCCATTCCAGTTA   | KR007670.1                 |
| NtADH1  | AAGCTGGAGGAATTGTGGAGAG  | ACCAGTGAACACAGGAAGAACA  | Tan <i>et al.</i> (2019)   |
| NtPDC1  | CCCGAACACCATTACATTTTC   | CATCAGCAGATTCCACGATTTTC | Tan <i>et al.</i> (2019)   |
| NtASC1  | AAACGAGCCATTGCAACAAAGA  | TGAATCCTGGTAAGCCCATGTC  | Tan <i>et al.</i> (2019)   |
| NtACO1  | GATTACACAAACAGACGGGACT  | TTGATTCCACCACACACAATAC  | Zhou <i>et al.</i> (2008)  |
| NtRbohA | AAGGTGTTATGAACGAAGTG    | CTGGTGCCTGATACGATA      | Xu <i>et al.</i> (2018)    |
| NtRbohB | CTATGCTTCAGTCTCTTCAC    | GGCGTGTTGTCTTAGTTC      | Xu <i>et al.</i> (2018)    |
| NtRbohD | ACCAGCACTGACCAAAGAA     | TAGCATCACAACCACAACATA   | Wu <i>et al.</i> (2008)    |
| NtERF3  | AGGAATTGATCTTGATCTTAAC  | ACAAAATTCAACCATTAGTCTC  | Ogata <i>et al.</i> (2012) |
| NtERF5  | GCCCAAAGTTCCAATCTTGA    | AACCTCCTGCTGCTTCATT     | XM_009596177.3             |
| NtERF4  | CGGGTCTGGTTAGGTACTTTC   | GTGACTTGGGCTCTGATTCT    | XM_009611511.3             |
| NtERF1  | GGAAGGCATTACAGAGGTGTTA  | CCAAACCCTAGCTCCATTCTT   | XM_009613506.3             |

## References

- Ogata, T.; Kida, Y.; Arai, T. *et al.* Overexpression of tobacco ethylene response factor *NtERF3* gene and its homologues from tobacco and rice induces hypersensitive response-like cell death in tobacco. *J. Gen. Plant Pathol.* **2012**, *78*, 8–17. doi: 10.1007/s10327-011-0355-5
- Tan, X.; Zwiazek, J.J. Stable expression of aquaporins and hypoxia-responsive genes in adventitious roots are linked to maintaining hydraulic conductance in tobacco (*Nicotiana tabacum*) exposed to root hypoxia. *PLoS One* **2019**, *14*(2), e0212059. doi: 10.1371/journal.pone.0212059
- Wu, L.; Zhang, Z.; Zhang, H.; Wang, X.C.; Huang, R. transcriptional modulation of ethylene response factor protein JERF3 in the oxidative stress response enhances tolerance of tobacco seedlings to salt, drought, and freezing. *Plant Physiol.* **2008**, *148*(4), 1953-1963. doi: 10.1104/pp.108.126813
- Xu, Y.; Zheng, X.; Song, Y. *et al.* NtLTP4, a lipid transfer protein that enhances salt and drought stresses tolerance in *Nicotiana tabacum*. *Sci. Rep.* **2018**, *8*, 8873. doi: 10.1038/s41598-018-27274-8
- Zhou, J.; Zhang, H.; Yang, Y.; Zhang, Z.; Zhang, H.; Hu, X.; Chen, J.; Wang, X.C.; Huang, R. Absciscic acid regulates TSRF1-mediated resistance to *Ralstonia solanacearum* by modifying the expression of GCC box-containing genes in tobacco. *J. Exp. Bot.* **2008**, *59*(3), 645-652. doi: 10.1093/jxb/erm353
